# Supplementary material for: Reconstructing post-Jurassic overburden in Central Europe: New insights from mudstone compaction and thermal history analyses of the Franconian Alb, SE Germany
Source: Copernicus journal article supplement (doi:10.5194/se-2022-18), 2022-02-15
Supplement: Supplementary file [file se-2022-18-AC2-supplement.pdf]

# Reconstructing post-Jurassic overburden in Central Europe: New insights from mudstone compaction and thermal history analyses of the Franconian Alb, SE Germany

## Response to reviewer's comments

### Reviewer Prof. Dr. Hilmar von Eynatten:

*Simon Freitag and co-authors use petrographic and petrophysical properties and organic maturation data of Lower and Middle Jurassic mudstones from outcrops and drillcores of the Franconian Alb to estimate thicknesses of the post-Jurassic regional overburden. The paper is overall well written, methods and calibrations appear sound to me (though I'm not an expert in petrophysical properties), and the results constitute a significant and highly relevant contribution for the understanding of the Mesozoic evolution of the area. I recommend minor revisions only. The authors may consider separating chapter 3 into 'Results' (largely sections 3.1 to 3.4) and 'Discussion' (largely 3.5 and 3.6, could then be a new chapter 4).*

*When comparing the results to those by von Eynatten et al. (2021) in section 3.5, please consider that their modeling leading to 3-4 km burial refers to Early Triassic (Bundsandstein) strata (their figure 10). Including about 600-800 m of Middle Triassic (Muschelkalk) and Late Triassic (Keuper) strata significantly reduces the contrast between the two studies. Moreover, the study area is located towards the eastern/southern margin of the domal uplift proposed by von Eynatten et al. (2021) with likely less uplift/exhumation, as already emphasized in section 3.6. Given that the thermal anomalies mentioned are mainly local (as already stated by Freitag et al.) and an elevated heat flow of 80-85 mWm<sup>-2</sup> still requires removal of 2.5-3 km of post-Early Triassic overburden (von Eynatten et al. 2021), I guess the contrast between the two studies remains within the uncertainties of the individual methods, implying that there is no need to call for increased heat flows or geothermal gradients.*

*Some parts appear over-referenced (and in this respect redundant in the Introduction and Methods parts, e.g. lines 125-126, 127-129, 133-134, 188-190). Please consider reducing to two or three major references as examples (e.g., ...) or being more specific regarding information and respective references.*

### **Authors response**

The authors thank the reviewer Prof. Dr. Hilmar von Eynatten for the constructive comments that helped in improving the content and quality of our manuscript. As recommended, we separated chapter 3 into 'Results' and 'Discussion', which contributed to a better structured and therefore more comprehensible manuscript. Reducing the amount of references in the over-referenced sections additionally increased the clarity of this manuscript. All the comments on the text have been addressed and reported in the table below.

### **Responses to comments on the text**

| <b>Reviewer #2 comments</b>                   | <b>Authors answers</b>                  |
|-----------------------------------------------|-----------------------------------------|
| Lines 80-82: sentence should be reformulated. | Lines 81-83: Sentence was reformulated. |

|                                                                                                                                                                                                                                                                                                                                                                                                                                                                   |                                                                                                                                                                                                                            |
|-------------------------------------------------------------------------------------------------------------------------------------------------------------------------------------------------------------------------------------------------------------------------------------------------------------------------------------------------------------------------------------------------------------------------------------------------------------------|----------------------------------------------------------------------------------------------------------------------------------------------------------------------------------------------------------------------------|
| Line 101: the Cretaceous strata are even more related to the parallel structure further south, not labelled in figure 1 but abbreviated as ‘DF’ in the inset (Bayrischer Pfahl?, not explained in caption). This should be clarified for readers not familiar with the regional geology.                                                                                                                                                                          | Lines 99-104: This information was added to the sentence and figure 1 including caption modified.                                                                                                                          |
| Line 281: it remains unclear whether these are 41 individual samples or 41 measurements on ca. 10 samples (please note that in the heading for table 1 and in the text (line 157) the numbers summing up to 41 (in case of GSC) are declared as measurements per sample). The same holds for line 222: 72 samples (or measurements per sample?) for bulk density and porosity. This should be consistent and clear for the readers without checking the Appendix. | Line 281: Yes, there must have happened a mistake. We changed the heading of table 1 and it should now be clear that the numbers are equal to the number of samples, which had been analysed (one measurement per sample). |
| Line 286: these terms should be used in figure 4a as well (i.e. avoid clayshale, mudshale, siltshale, they are rather unusual).                                                                                                                                                                                                                                                                                                                                   | Line 286: Figure 4 changed accordingly.                                                                                                                                                                                    |
| Line 314: quartz, pyrite, ...                                                                                                                                                                                                                                                                                                                                                                                                                                     | Line 314: Text modified.                                                                                                                                                                                                   |
| Line 331: ... (2018) suggests vertical effective stresses ... and roughly equates to 700-2000 m true vertical depth.                                                                                                                                                                                                                                                                                                                                              | Lines 331-32: Text changed accordingly.                                                                                                                                                                                    |
| Line 440: just for consistency, lower limit is 800 m in Fig.9, caption to Fig. 9 and in the text (line 450).                                                                                                                                                                                                                                                                                                                                                      | Line 440: Text changed accordingly.                                                                                                                                                                                        |
| Line 472: not fully clear how the 1.1 km are deduced.                                                                                                                                                                                                                                                                                                                                                                                                             | Lines 471-472: Text modified so that the origin of the 1.1 km should be clear now.                                                                                                                                         |
| Line 490: von Eynatten et al. ...                                                                                                                                                                                                                                                                                                                                                                                                                                 | Line 490: Text changed accordingly.                                                                                                                                                                                        |
| Line 645: though correct for German name rules, ‘von ...’ is usually listed under ‘v’ in the reference lists of international journals. The same holds for ‘Le Bayon et al.’, etc. I guess.                                                                                                                                                                                                                                                                       | Line 827: Order in references changed accordingly.                                                                                                                                                                         |
